# Supplementary material
Source: publisher figshare collection journal article supplement (https://diabetesjournals.figshare.com/articles/dataset/_/14932734)
Supplement: Supplementary file 1 [file 1]

## **Supplementary Figures**

### **Figure S1 Kidney and intraglomerular hemodynamic parameters**

## Supplementary Tables

**Table S1. Mean of posterior probabilities by latent classes for the LCMM model with 2 classes**

### **A. Intraglomerular pressure ( $P_{GLO}$ )**

| Latent class | n (%)      | Average posterior probabilities (%) |             |
|--------------|------------|-------------------------------------|-------------|
|              |            | Class 1                             | Class 2     |
| Class 1      | 23 (9.7)   | <b>85.2</b>                         | 14.8        |
| Class 2      | 214 (90.3) | 8.7                                 | <b>91.3</b> |

### **B. Afferent to efferent arteriolar resistance ( $R_A/R_E$ ) ratio**

| Latent class | n (%)      | Average posterior probabilities (%) |              |
|--------------|------------|-------------------------------------|--------------|
|              |            | Class 1                             | Class 2      |
| Class 1      | 24 (10.1)  | <b>88.63</b>                        | 11.37        |
| Class 2      | 213 (89.9) | 4.30                                | <b>95.70</b> |

**Table S2 Partial Spearman correlation matrix between hemodynamic and morphometric variables**

|                                          | <i>ACR</i>   | <i>V<sub>G</sub></i> | <i>TFS</i>        | <i>Sv</i>    | <i>%FE</i>    | <i>Podo</i> | <i>GS</i> | <i>GBM</i>    | <i>Vv<sub>Mes</sub></i> | <i>Vv<sub>Int</sub></i> | <i>%PD</i>   | <i>FPW</i> |
|------------------------------------------|--------------|----------------------|-------------------|--------------|---------------|-------------|-----------|---------------|-------------------------|-------------------------|--------------|------------|
| <b>GFR</b>                               | 0.03         | 0.12                 | <b>0.31</b>       | <b>0.23</b>  | <b>0.26</b>   | 0.10        | -0.003    | -0.17         | <b>-0.32</b>            | -0.19                   | -0.05        | -0.07      |
|                                          | 0.77         | 0.21                 | <b>0.001</b>      | <b>0.02</b>  | <b>0.006</b>  | 0.32        | 0.98      | 0.08          | <b>0.0009</b>           | 0.06                    | 0.63         | 0.47       |
| <b>RPF</b>                               | <b>0.29</b>  | <b>0.21</b>          | 0.13              | -0.03        | 0.005         | 0.05        | 0.07      | 0.08          | -0.003                  | 0.07                    | 0.11         | 0.09       |
|                                          | <b>0.003</b> | <b>0.03</b>          | 0.20              | 0.77         | 0.96          | 0.60        | 0.49      | 0.43          | 0.97                    | 0.48                    | 0.25         | 0.38       |
| <b>FF</b>                                | <b>-0.23</b> | -0.04                | <b>0.22</b>       | <b>0.27</b>  | <b>0.34</b>   | 0.12        | -0.10     | <b>-0.33</b>  | <b>-0.39</b>            | <b>-0.35</b>            | <b>-0.19</b> | -0.15      |
|                                          | <b>0.02</b>  | 0.65                 | <b>0.02</b>       | <b>0.005</b> | <b>0.0004</b> | 0.22        | 0.30      | <b>0.0006</b> | <b>&lt;0.0001</b>       | <b>0.0002</b>           | <b>0.047</b> | 0.13       |
| <b>RBF</b>                               | <b>0.22</b>  | 0.17                 | 0.15              | 0.02         | 0.06          | 0.07        | 0.03      | 0.02          | -0.06                   | 0.05                    | 0.13         | 0.05       |
|                                          | <b>0.03</b>  | 0.08                 | 0.13              | 0.8055       | 0.55          | 0.48        | 0.78      | 0.82          | 0.53                    | 0.63                    | 0.19         | 0.64       |
| <b>RVR</b>                               | <b>-0.21</b> | <b>-0.22</b>         | <b>-0.20</b>      | -0.05        | -0.08         | -0.11       | -0.03     | -0.01         | 0.09                    | -0.01                   | -0.14        | -0.02      |
|                                          | <b>0.03</b>  | <b>0.03</b>          | <b>0.04</b>       | 0.5807       | 0.40          | 0.27        | 0.79      | 0.92          | 0.37                    | 0.90                    | 0.15         | 0.85       |
| <b>P<sub>GLO</sub></b>                   | -0.03        | 0.13                 | <b>0.36</b>       | <b>0.26</b>  | <b>0.30</b>   | 0.07        | 0.01      | <b>-0.22</b>  | <b>-0.37</b>            | <b>-0.24</b>            | -0.04        | -0.18      |
|                                          | 0.74         | 0.17                 | <b>0.0001</b>     | <b>0.007</b> | <b>0.002</b>  | 0.51        | 0.89      | <b>0.02</b>   | <b>0.0001</b>           | <b>0.01</b>             | 0.72         | 0.07       |
| <b>R<sub>A</sub>/R<sub>E</sub> ratio</b> | -0.02        | -0.16                | <b>-0.39</b>      | <b>-0.29</b> | <b>-0.33</b>  | -0.13       | -0.001    | <b>0.25</b>   | <b>0.36</b>             | <b>0.27</b>             | 0.03         | 0.09       |
|                                          | 0.82         | 0.10                 | <b>&lt;0.0001</b> | <b>0.003</b> | <b>0.0006</b> | 0.20        | 0.99      | <b>0.01</b>   | <b>0.0002</b>           | <b>0.005</b>            | 0.74         | 0.35       |

*P* values < 0.05 are shown in bold

Correlations are adjusted for age, diabetes duration, BMI, sex, HbA1c, mean arterial pressure.

GFR, glomerular filtration rate; RPF, efficient renal plasma flow; FF, filtration fraction; RBF, renal blood flow; RVR, renal vascular resistance; P<sub>GLO</sub>, intraglomerular pressure; R<sub>A</sub>, afferent arteriolar resistance; R<sub>E</sub>, efferent arteriolar resistance. *V<sub>G</sub>* glomerular volume, *SV* glomerular filtration surface density, *%FE* percentage of fenestrated endothelium, *Podo* podocyte cell number per glomerulus, *TFS* total filtration surface per glomerulus, *GBM* glomerular basement membrane width, *GS* glomerulosclerosis index, *Vv<sub>Mes</sub>* mesangial fractional volume, *Vv<sub>Int</sub>* cortical interstitial fractional volume, *%PD* percentage of podocyte detachment, *FPW* foot process width.
